# Supplementary material
Source: ML conference proceedings conference paper supplement (https://openreview.net/forum?id=U4aT9LYsXb)
Supplement: supplementary_material [file attachment]

# Supplementary Materials

Anonymous Authors

## 1 DETAILED DERIVATIONS OF THEORETICAL ANALYSIS

Since the edge subgraph sampled from the Shadow-Target Bridge Graph contains nodes from both partial target graph and shadow graph, we start with a formal definition of target nodes density:

*Definition 1.1.* [Density of target nodes in the edge subgraph]

$$D = \frac{1}{|\mathcal{V}_{i,j}^r|} \sum_{v \in \mathcal{V}_{i,j}^r} \frac{|\{u|u \in N_v^t\}|}{|\{u|u \in N_v^t\}| + |\{u|u \in N_v^s\}|}, \quad (1)$$

where  $\mathcal{V}_{i,j}^r$  is the nodes set of the edge subgraph  $\mathcal{G}_{i,j}^r$  of edge  $(v_i, v_j)$ . For node  $v$ ,  $N_v^t$  is the neighbor set that belong to partial target graph, and  $N_v^s$  is the neighbor set that belong to shadow graph.  $D$  ranges from 0 to 1, with a larger  $D$  indicating a higher proportion of nodes from partial target graph in the edge subgraph.

We define the privacy theft of edge subgraph structure feature extraction process as follows:

*Definition 1.2 (Measurement of privacy theft for edge subgraph structure feature extraction).* Given the link and its corresponding edge subgraph, the nodes' features and representations after edge subgraph structure feature extraction follow the distributions  $\mathbf{P}$  and  $\tilde{\mathbf{P}}$ , respectively. Privacy theft for edge subgraph structure feature extraction is measured by the distance between  $\mathbf{P}$  and  $\tilde{\mathbf{P}}$ .

For the convenience of subsequent analysis, we employ the Wasserstein distance to measure the distance between two multi-variate normal distributions  $p \sim \mathcal{N}(\mu_p, \Sigma_p)$  and  $q \sim \mathcal{N}(\mu_q, \Sigma_q)$ :

$$\mathcal{W}[p, q] = (\mu_p - \mu_q)^T (\mu_p - \mu_q) + \text{Tr}(\Sigma_p) + \text{Tr}(\Sigma_q) - 2\text{Tr}((\Sigma_p^{\frac{1}{2}} \Sigma_q \Sigma_p^{\frac{1}{2}})^{\frac{1}{2}}). \quad (2)$$

We employ Contextual Stochastic Block Model for our analysis, treating the edge subgraph with  $n$  nodes as a random graph  $\mathcal{G}_{i,j}^r \sim (n, p, q, \mu, k\mu, d)$ . In the edge subgraph, we use  $v^t$  to represent the nodes from the partial target graph and  $v^s$  to represent the nodes from the shadow graph. We denote feature vectors of  $v^t$  as  $x^t$ , where each dimension of  $x^t$  follows  $\mathcal{N}(\mu, 1)$ , whereas those of  $v^s$  as  $x^s$ , where each dimension of  $x^s$  follows  $\mathcal{N}(k\mu, 1)$ . Thus,  $x^t$  follow the normal distribution  $\mathcal{N}(\mu_{x^t}, \Sigma_{x^t})$  and  $x^s$  follow the normal distribution  $\mathcal{N}(\mu_{x^s}, \Sigma_{x^s})$ , where

$$\mu_{x^t}[i] = \mu, \mu_{x^s}[i] = k\mu, \Sigma_{x^t}[i, i] = \Sigma_{x^s}[i, i] = 1 \quad (0 \leq i < d). \quad (3)$$

**Best-case scenario.** The representation of node  $a$  after propagation can be written as:

$$z_a = \frac{1}{|N_a|} x_a^t + \sum_{b \in N_a^t} \frac{1}{\sqrt{|N_a| |N_b|}} x_b^t, \quad (4)$$

where  $N_a$  denotes the neighbor set of node  $v_a$ . Consider the generation process of the synthetic edge subgraph that only includes nodes  $v^t$ , which means  $N_a = N_a^t$ . For each node, the approximate size of its neighbor set can be expressed as  $np$ . Thus representations

of nodes in the edge subgraph follow distribution  $\mathcal{N}(\mu_z, \Sigma_z)$ , where

$$\begin{aligned} \mu_z[i] &= \frac{\mu}{|N_a|} + \sum_{b \in N_a^t} \frac{\mu}{\sqrt{|N_a| |N_b|}} \\ &= \frac{\mu}{np} + np \cdot \frac{\mu}{\sqrt{np} \sqrt{np}} \\ &= \frac{1+np}{np} \mu, \end{aligned} \quad (5)$$

$$\begin{aligned} \Sigma_z[i, i] &= \frac{1}{|N_a|^2} + \sum_{b \in N_a^t} \frac{1}{|N_a| |N_b|} \\ &= \frac{1}{(np)^2} + np \cdot \frac{1}{np \cdot np} \\ &= \frac{1+np}{n^2 p^2} \quad (0 \leq i < d). \end{aligned} \quad (6)$$

Using Eq.2 and Def.1.2, in the optimal case where the edge subgraph only includes  $v^t$ , privacy theft ( $PT$ ) of edge subgraph structure feature extraction can be quantified as:

$$\begin{aligned} PT^{opt} &= \mathcal{W}[z, x] \\ &= (\mu_z - \mu_x)^T (\mu_z - \mu_x) + \text{Tr}(\Sigma_z) + \text{Tr}(\Sigma_x) - 2\text{Tr}((\Sigma_z^{\frac{1}{2}} \Sigma_x \Sigma_z^{\frac{1}{2}})^{\frac{1}{2}}) \\ &= \sum_{i=1}^d \left( \frac{1+np}{np} \mu - \mu \right)^2 + \sum_{i=1}^d \frac{1+np}{n^2 p^2} + \sum_{i=1}^d 1 - 2 \sum_{i=1}^d \sqrt{\frac{1+np}{n^2 p^2}} \\ &= d\mu^2 \left( \frac{1}{np} \right)^2 + d \left( \sqrt{\frac{np+1}{n^2 p^2}} - 1 \right)^2. \end{aligned} \quad (7)$$

**General-case scenario.** The representation of node  $a$  after propagation can be written as:

$$z_a = \frac{1}{|N_a|} x_a + \sum_{b \in N_a^t} \frac{1}{\sqrt{|N_a| |N_b|}} x_b^t + \sum_{b \in N_a^s} \frac{1}{\sqrt{|N_a| |N_b|}} x_b^s, \quad (8)$$

where  $N_a$  denotes the neighbor set of node  $v_a$ . Each node's neighbors consist of both nodes  $v^t$  and  $v^s$ , hence  $N_a = N_a^t \cup N_a^s$ . The size of the neighbor set can be approximately represented as  $n(p+q)$ . A percentage of  $p/(p+q)$  of its neighbors are  $v^t$ , whereas a percentage of  $q/(p+q)$  of its neighbors are  $v^s$ . In the edge subgraph, for the nodes  $v^t$  from the partial target graph, their representations  $z^t$  follow the distribution  $\mathcal{N}(\mu_{z^t}, \Sigma_{z^t})$ , while those of  $v^s$  from the shadow graph follow the distribution  $\mathcal{N}(\mu_{z^s}, \Sigma_{z^s})$ , where

$$\begin{aligned} \mu_{z^t}[i] &= \frac{\mu}{|N_a|} + \sum_{b \in N_a^t} \frac{\mu}{\sqrt{|N_a| |N_b|}} + \sum_{b \in N_a^s} \frac{k\mu}{\sqrt{|N_a| |N_b|}} \\ &= \frac{\mu}{n(p+q)} + np \cdot \frac{\mu}{n(p+q)} + nq \cdot \frac{k\mu}{n(p+q)} \\ &= \frac{1+n(p+kq)}{n(p+q)} \mu, \end{aligned} \quad (9)$$

$$\begin{aligned}\mu_{z^s}[i] &= \frac{k\mu}{|N_a|} + \sum_{b \in N_a^t} \frac{\mu}{\sqrt{|N_a||N_b|}} + \sum_{b \in N_a^s} \frac{k\mu}{\sqrt{|N_a||N_b|}} \\ &= \frac{k\mu}{n(p+q)} + np \cdot \frac{\mu}{n(p+q)} + nq \cdot \frac{k\mu}{n(p+q)} \\ &= \frac{k+n(p+kq)}{n(p+q)}\mu,\end{aligned}\quad (10)$$

$$\begin{aligned}\Sigma_{z^s}[i, i] &= \Sigma_{z^t}[i, i] = \frac{1}{|N_a|^2} + \sum_{b \in N_a} \frac{1}{|N_a||N_b|} \\ &= \frac{1}{n^2(p+q)^2} + n(p+q) \cdot \frac{1}{n^2(p+q)^2} \\ &= \frac{1+n(p+q)}{n^2(p+q)^2},\end{aligned}\quad (11)$$

where  $0 \leq i < d$ . To facilitate analysis, we take the average of  $z^t$  and  $z^s$ , such that the representations of all nodes in the edge subgraph approximately follow distribution  $\mathcal{N}(\mu_z, \Sigma_z) = \mathcal{N}(\frac{\mu_{z^t} + \mu_{z^s}}{2}, \frac{\Sigma_{z^t} + \Sigma_{z^s}}{2})$ . Correspondingly, initial feature vectors approximately follow distribution  $\mathcal{N}(\mu_x, \Sigma_x) = \mathcal{N}(\frac{\mu_{x^t} + \mu_{x^s}}{2}, \frac{\Sigma_{x^t} + \Sigma_{x^s}}{2})$ , where

$$\begin{aligned}\mu_z[i] &= \frac{(k+1) + 2n(p+kq)}{2n(p+q)}\mu, \quad \Sigma_z[i, i] = \frac{n(p+q) + 1}{n^2(p+q)^2}, \\ \mu_x[i] &= \frac{(k+1)}{2}\mu, \quad \Sigma_x[i, i] = 1.\end{aligned}\quad (12)$$

Similar to the procedure used to compute  $PT^{opt}$ , using Eq.2 and Def.1.2, in the general case where the edge subgraph contains both  $v^t$  and  $v^s$ , privacy theft of edge subgraph structure feature extraction can be quantified as:

$$\begin{aligned}PT &= \mathcal{W}[z, x] \\ &= (\mu_z - \mu_x)^T (\mu_z - \mu_x) + \text{Tr}(\Sigma_z) + \text{Tr}(\Sigma_x) - 2\text{Tr}((\Sigma_z^{\frac{1}{2}} \Sigma_x \Sigma_z^{\frac{1}{2}})^{\frac{1}{2}}) \\ &= d\mu^2 \left[ \frac{1}{n(p+q)} \frac{1+k}{2} + \frac{p-q}{p+q} \frac{1-k}{2} \right]^2 + d \left( \sqrt{\frac{n(p+q)+1}{n^2(p+q)^2}} - 1 \right)^2.\end{aligned}\quad (13)$$

**Further analysis.** In the above discussion, two distinct scenarios of privacy theft were derived based on both the optimal scenario and the general scenario. To approximate the level of privacy theft in Eq.13 to that of Eq.7, i.e., to make  $\Delta PT = PT^{opt} - PT$  approach 0 as much as possible, it can be readily observed that  $k$  should equal 1. When  $k = 1$ , the representation of  $\Delta PT$  is:

$$\begin{aligned}\Delta PT &= d\mu^2 \left[ \left( \frac{1}{np} \right)^2 - \left( \frac{1}{n(p+q)} \right)^2 \right] \\ &\quad + d \left[ \left( \sqrt{\frac{np+1}{n^2p^2}} - 1 \right)^2 - \left( \sqrt{\frac{n(p+q)+1}{n^2(p+q)^2}} - 1 \right)^2 \right].\end{aligned}\quad (14)$$

Based on Definition 1.1, we can get

$$\begin{aligned}D &= \frac{1}{|\mathcal{V}_{i,j}^r|} \sum_{v \in \mathcal{V}_{i,j}^r} \left| \frac{|\{u|u \in N_v^{target}\}|}{|\{u|u \in N_v^{target}\}| + |\{u|u \in N_v^{shadow}\}|} \right| \\ &= \frac{1}{n} \sum_{v \in \mathcal{V}_{i,j}^r} \frac{np}{np+nq} = \frac{p}{p+q}.\end{aligned}\quad (15)$$

Then, we substitute Eq.15 into Eq.14. We can transform it into the following form:

$$\begin{aligned}\Delta PT &= d\mu^2 \left[ \left( \frac{1}{np} \right)^2 - \left( \frac{D}{np} \right)^2 \right] + d \left[ \left( \sqrt{\frac{np+1}{n^2p^2}} - 1 \right)^2 \right. \\ &\quad \left. - \left( \sqrt{\frac{npD+D^2}{n^2p^2}} - 1 \right)^2 \right] \\ &= d\mu^2 \frac{1-D^2}{n^2p^2} + d \left[ \sqrt{\frac{np+1}{n^2p^2}} - \sqrt{\frac{npD+D^2}{n^2p^2}} \right] \\ &\quad \cdot \left[ \sqrt{\frac{np+1}{n^2p^2}} + \sqrt{\frac{npD+D^2}{n^2p^2}} - 2 \right] \\ &= d\mu^2 \frac{(1-D)(1+D)}{n^2p^2} + d \frac{\sqrt{np+1} - \sqrt{npD+D^2}}{np} \\ &\quad \cdot \frac{\sqrt{np+1} + \sqrt{npD+D^2} - 2np}{np} \\ &= d\mu^2 \frac{(1-D)(1+D)}{n^2p^2} + d \frac{np+1 - npD - D^2}{np(\sqrt{np+1} + \sqrt{npD+D^2})} \\ &\quad \cdot \frac{\sqrt{np+1} + \sqrt{npD+D^2} - 2np}{np} \\ &= d\mu^2 \frac{(1-D)(1+D)}{n^2p^2} + d \frac{(1-D)(np+1+D)}{np(\sqrt{np+1} + \sqrt{npD+D^2})} \\ &\quad \cdot \frac{\sqrt{np+1} + \sqrt{npD+D^2} - 2np}{np} \\ &= d \left[ \frac{1+D}{n^2p^2} \mu^2 + \frac{np+1+D}{np(\sqrt{np+1} + \sqrt{npD+D^2})} \right. \\ &\quad \left. \cdot \frac{\sqrt{np+1} + \sqrt{npD+D^2} - 2np}{np} \right] (1-D)\end{aligned}\quad (16)$$

Finally, we obtain the mathematical representation of  $\Delta PT$  in the main paper.

## 2 DETAILS OF THE DATASET

We use four real datasets from different multimedia domains including sixteen graphs for evaluation. See Table 1 for the statistics of the dataset

**Twitch.** The Twitch dataset contains social networks from five regions (ENGB, ES, TW, RU, PTBR). Nodes represent users within a country, and edges represent mutual friendships. The attributes of each node include the user's game preferences, location, and streaming habits. The task of the GNN model is to predict whether the streamer will use explicit language.

**Facebook.** The Facebook dataset contains social networks from five US universities (Caltech, Haverford, Reed, Simmons, Swarthmore). Nodes represent students at an American university, and edges represent friendships between two students. The attributes of each node include the student's grade, major, high school, and place of residence. The task of the GNN model is to predict the gender of a user.

**ArnetMiner.** The ArnetMiner dataset contains citation networks from three academic databases (DBLPv7, Citationv1, and ACMv9).

Table 1: Statistics for datasets.

| Dataset    |            | Nodes | Edges | Features | Classes | Density | Avg Degree |
|------------|------------|-------|-------|----------|---------|---------|------------|
| ArnetMiner | Dblpv7     | 5484  | 8130  | 6775     | 5       | 0.0005  | 1          |
|            | Acmv9      | 9360  | 15602 | 6775     | 5       | 0.0004  | 1          |
|            | Citationv1 | 8935  | 15113 | 6775     | 5       | 0.0004  | 1          |
| Airport    | Brazil     | 131   | 1134  | 8        | 4       | 0.1332  | 8          |
|            | Europe     | 399   | 6392  | 8        | 4       | 0.0805  | 15         |
|            | USA        | 1190  | 14789 | 8        | 4       | 0.0209  | 11         |
| Twitch     | ENGB       | 7126  | 35324 | 3170     | 2       | 0.0014  | 4          |
|            | ES         | 4648  | 59382 | 3170     | 2       | 0.0055  | 12         |
|            | PTBR       | 1912  | 31299 | 3170     | 2       | 0.0171  | 16         |
|            | RU         | 4385  | 37304 | 3170     | 2       | 0.0039  | 8          |
|            | TW         | 2772  | 63462 | 3170     | 2       | 0.0165  | 22         |
| Facebook   | Caltech    | 769   | 16656 | 3020     | 3       | 0.0564  | 21         |
|            | Haverford  | 1446  | 59589 | 3020     | 3       | 0.0570  | 41         |
|            | Reed       | 962   | 18812 | 3020     | 3       | 0.0407  | 19         |
|            | Simmons    | 1518  | 32988 | 3020     | 3       | 0.0287  | 21         |
|            | Swarthmore | 1659  | 61050 | 3020     | 3       | 0.0444  | 36         |

Nodes represent papers, and edges represent citation relationships. The attributes of each node consist of sparse bag-of-words features extracted from the paper titles. The task of the GNN model is to predict the related research field of the paper.

**Airport.** The Airport dataset contains airport networks from three countries or regions (Brazil, USA, and Europe). Nodes represent airports, and edges represent the presence or absence of commercial flights between two airports. We use the one-hot encoding of the node as the node feature. The task of the GNN model is to predict airport activity levels measured by flights or the number of people passing through the airport.

3 MORE EXPERIMENTAL RESULTS

In the main paper, we demonstrate the performance of LinkThief when the link leakage rate of the target graph is 0.3. Next, we will demonstrate how LinkThief performs when the target graph’s link leakage rate is 0.1 and 0.2, respectively. As shown in Table 2 ~ 9, We can observe that LinkThief demonstrates superior link stealing performance compared to LSA-3 and LSA-4, regardless of the target graph’s link leakage rate.

Table 2: Performance of LinkThief on the Twitch dataset with a target graph leak rate of 0.1.

| Shadow Dataset |        |               |               |               |               |               |               |               |               |               |               |
|----------------|--------|---------------|---------------|---------------|---------------|---------------|---------------|---------------|---------------|---------------|---------------|
| Target         | Attack | ENGB          |               | ES            |               | PTBR          |               | RU            |               | TW            |               |
| Dataset        | Method | ASR           | AUC           |
| ENGB           | LSA-3  | -             | -             | 0.5376        | 0.5612        | 0.5278        | 0.5402        | 0.5346        | 0.5601        | 0.5287        | 0.5398        |
|                | LSA-4  | -             | -             | 0.4997        | 0.5352        | 0.5203        | 0.5147        | 0.5134        | 0.5287        | 0.5117        | 0.5108        |
|                | Ours   | -             | -             | <b>0.7542</b> | <b>0.8324</b> | <b>0.7579</b> | <b>0.8257</b> | <b>0.7604</b> | <b>0.8296</b> | <b>0.7519</b> | <b>0.8164</b> |
| ES             | LSA-3  | 0.5333        | 0.5724        | -             | -             | 0.5437        | 0.5743        | 0.5437        | 0.5732        | 0.5413        | 0.5672        |
|                | LSA-4  | 0.5001        | 0.5021        | -             | -             | 0.4986        | 0.5002        | 0.4879        | 0.4823        | 0.4977        | 0.4953        |
|                | Ours   | <b>0.8142</b> | <b>0.8797</b> | -             | -             | <b>0.7984</b> | <b>0.8688</b> | <b>0.8003</b> | <b>0.8744</b> | <b>0.8047</b> | <b>0.8716</b> |
| PTBR           | LSA-3  | 0.5256        | 0.5787        | 0.5523        | 0.5804        | -             | -             | 0.5503        | 0.5804        | 0.5388        | 0.5784        |
|                | LSA-4  | 0.5086        | 0.5189        | 0.4936        | 0.5189        | -             | -             | 0.5091        | 0.5008        | 0.5182        | 0.5077        |
|                | Ours   | <b>0.8003</b> | <b>0.8715</b> | <b>0.7958</b> | <b>0.8649</b> | -             | -             | <b>0.7932</b> | <b>0.8687</b> | <b>0.7958</b> | <b>0.8587</b> |
| RU             | LSA-3  | 0.5386        | 0.5587        | 0.5301        | 0.5497        | 0.5303        | 0.5518        | -             | -             | 0.5238        | 0.5384        |
|                | LSA-4  | 0.5078        | 0.5013        | 0.4991        | 0.5203        | 0.4901        | 0.4992        | -             | -             | 0.4903        | 0.4937        |
|                | Ours   | <b>0.8217</b> | <b>0.8935</b> | <b>0.7844</b> | <b>0.8573</b> | <b>0.7943</b> | <b>0.8627</b> | -             | -             | <b>0.7852</b> | <b>0.8678</b> |
| TW             | LSA-3  | 0.5198        | 0.5375        | 0.5286        | 0.5387        | 0.5187        | 0.5289        | 0.5183        | 0.5482        | -             | -             |
|                | LSA-4  | 0.5089        | 0.5112        | 0.4956        | 0.5006        | 0.5119        | 0.5203        | 0.5101        | 0.5024        | -             | -             |
|                | Ours   | <b>0.8152</b> | <b>0.8887</b> | <b>0.8021</b> | <b>0.8866</b> | <b>0.8018</b> | <b>0.8763</b> | <b>0.8112</b> | <b>0.8832</b> | -             | -             |

Table 3: Performance of LinkThief on the Twitch dataset with a target graph leak rate of 0.2.

| Shadow Dataset |        |               |               |               |               |               |               |               |               |               |               |
|----------------|--------|---------------|---------------|---------------|---------------|---------------|---------------|---------------|---------------|---------------|---------------|
| Target         | Attack | ENGB          |               | ES            |               | PTBR          |               | RU            |               | TW            |               |
| Dataset        | Method | ASR           | AUC           |
| ENGB           | LSA-3  | -             | -             | 0.5401        | 0.5642        | 0.5298        | 0.5443        | 0.5379        | 0.5627        | 0.5302        | 0.5417        |
|                | LSA-4  | -             | -             | 0.4982        | 0.5357        | 0.5224        | 0.5187        | 0.5183        | 0.5307        | 0.5197        | 0.5164        |
|                | Ours   | -             | -             | <b>0.7718</b> | <b>0.8468</b> | <b>0.7726</b> | <b>0.8437</b> | <b>0.7732</b> | <b>0.8324</b> | <b>0.7699</b> | <b>0.8349</b> |
| ES             | LSA-3  | 0.5342        | 0.5761        | -             | -             | 0.5488        | 0.5789        | 0.5526        | 0.5819        | 0.5501        | 0.5786        |
|                | LSA-4  | 0.5009        | 0.5054        | -             | -             | 0.5001        | 0.5026        | 0.4902        | 0.4887        | 0.4992        | 0.5001        |
|                | Ours   | <b>0.8231</b> | <b>0.8903</b> | -             | -             | <b>0.8154</b> | <b>0.8852</b> | <b>0.8161</b> | <b>0.8913</b> | <b>0.8263</b> | <b>0.8894</b> |
| PTBR           | LSA-3  | 0.5497        | 0.5802        | 0.5572        | 0.5849        | -             | -             | 0.5541        | 0.5839        | 0.5401        | 0.5802        |
|                | LSA-4  | 0.5102        | 0.5203        | 0.4977        | 0.5258        | -             | -             | 0.5107        | 0.5026        | 0.5201        | 0.5126        |
|                | Ours   | <b>0.8276</b> | <b>0.9048</b> | <b>0.8035</b> | <b>0.8851</b> | -             | -             | <b>0.8154</b> | <b>0.8849</b> | <b>0.8143</b> | <b>0.8812</b> |
| RU             | LSA-3  | 0.5413        | 0.5602        | 0.5317        | 0.5528        | 0.5342        | 0.5542        | -             | -             | 0.5255        | 0.5407        |
|                | LSA-4  | 0.5100        | 0.5038        | 0.5026        | 0.5237        | 0.4921        | 0.5008        | -             | -             | 0.4946        | 0.5001        |
|                | Ours   | <b>0.8127</b> | <b>0.8842</b> | <b>0.8001</b> | <b>0.8712</b> | <b>0.8054</b> | <b>0.8809</b> | -             | -             | <b>0.8001</b> | <b>0.8794</b> |
| TW             | LSA-3  | 0.5252        | 0.5401        | 0.5302        | 0.5406        | 0.5217        | 0.5303        | 0.5261        | 0.5497        | -             | -             |
|                | LSA-4  | 0.5113        | 0.5132        | 0.4987        | 0.5031        | 0.5145        | 0.5237        | 0.5117        | 0.5081        | -             | -             |
|                | Ours   | <b>0.8273</b> | <b>0.8903</b> | <b>0.8217</b> | <b>0.8974</b> | <b>0.8172</b> | <b>0.8955</b> | <b>0.8287</b> | <b>0.8973</b> | -             | -             |

Table 4: Performance of LinkThief on the Facebook dataset with a target graph leak rate of 0.1.

| Shadow Dataset |        |               |               |               |               |               |               |               |               |               |               |
|----------------|--------|---------------|---------------|---------------|---------------|---------------|---------------|---------------|---------------|---------------|---------------|
| Target         | Attack | Caltech       |               | Haverford     |               | Reed          |               | Simmons       |               | Swarthmore    |               |
| Dataset        | Method | ASR           | AUC           |
| Caltech        | LSA-3  | -             | -             | 0.5702        | 0.6125        | 0.5637        | 0.6048        | 0.5713        | 0.6102        | 0.5747        | 0.6173        |
|                | LSA-4  | -             | -             | 0.4987        | 0.5289        | 0.5189        | 0.5137        | 0.5117        | 0.5302        | 0.5187        | 0.5189        |
|                | Ours   | -             | -             | <b>0.7348</b> | <b>0.8053</b> | <b>0.7258</b> | <b>0.7940</b> | <b>0.7203</b> | <b>0.7887</b> | <b>0.7253</b> | <b>0.8064</b> |
| Haverford      | LSA-3  | 0.5543        | 0.5912        | -             | -             | 0.5683        | 0.6001        | 0.5623        | 0.5897        | 0.5713        | 0.6002        |
|                | LSA-4  | 0.4921        | 0.5003        | -             | -             | 0.4983        | 0.5002        | 0.4831        | 0.4904        | 0.5002        | 0.4988        |
|                | Ours   | <b>0.7389</b> | <b>0.8187</b> | -             | -             | <b>0.8109</b> | <b>0.8176</b> | <b>0.7376</b> | <b>0.8136</b> | <b>0.7256</b> | <b>0.8123</b> |
| Reed           | LSA-3  | 0.5324        | 0.5675        | 0.5381        | 0.5636        | -             | -             | 0.5329        | 0.5648        | 0.5376        | 0.5639        |
|                | LSA-4  | 0.5056        | 0.5103        | 0.4931        | 0.5132        | -             | -             | 0.5072        | 0.5001        | 0.5103        | 0.5103        |
|                | Ours   | <b>0.7031</b> | <b>0.7604</b> | <b>0.7165</b> | <b>0.7832</b> | -             | -             | <b>0.7067</b> | <b>0.7729</b> | <b>0.7012</b> | <b>0.7698</b> |
| Simmons        | LSA-3  | 0.5713        | 0.6123        | 0.5621        | 0.5912        | 0.5672        | 0.6058        | -             | -             | 0.5641        | 0.6098        |
|                | LSA-4  | 0.5098        | 0.5012        | 0.5008        | 0.5171        | 0.4878        | 0.5001        | -             | -             | 0.4923        | 0.4984        |
|                | Ours   | <b>0.7539</b> | <b>0.8168</b> | <b>0.7483</b> | <b>0.8163</b> | <b>0.7396</b> | <b>0.8031</b> | -             | -             | <b>0.7623</b> | <b>0.8016</b> |
| Swarthmore     | LSA-3  | 0.5701        | 0.5981        | 0.5675        | 0.5904        | 0.5647        | 0.5887        | 0.5605        | 0.5809        | -             | -             |
|                | LSA-4  | 0.5063        | 0.5032        | 0.4947        | 0.5003        | 0.5036        | 0.5123        | 0.5088        | 0.5039        | -             | -             |
|                | Ours   | <b>0.7341</b> | <b>0.7953</b> | <b>0.7358</b> | <b>0.7983</b> | <b>0.7312</b> | <b>0.8027</b> | <b>0.7011</b> | <b>0.7849</b> | -             | -             |

Table 5: Performance of LinkThief on the Facebook dataset with a target graph leak rate of 0.2.

| Shadow Dataset |        |         |        |           |        |        |        |         |        |            |        |
|----------------|--------|---------|--------|-----------|--------|--------|--------|---------|--------|------------|--------|
| Target         | Attack | Caltech |        | Haverford |        | Reed   |        | Simmons |        | Swarthmore |        |
| Dataset        | Method | ASR     | AUC    | ASR       | AUC    | ASR    | AUC    | ASR     | AUC    | ASR        | AUC    |
| Caltech        | LSA-3  | -       | -      | 0.5728    | 0.6164 | 0.5703 | 0.6124 | 0.5742  | 0.6148 | 0.5747     | 0.6173 |
|                | LSA-4  | -       | -      | 0.4997    | 0.5328 | 0.5202 | 0.5188 | 0.5200  | 0.5327 | 0.5206     | 0.5203 |
|                | Ours   | -       | -      | 0.7687    | 0.8425 | 0.8099 | 0.8834 | 0.8050  | 0.8803 | 0.7589     | 0.8432 |
| Haverford      | LSA-3  | 0.5627  | 0.5963 | -         | -      | 0.5718 | 0.6024 | 0.5698  | 0.5931 | 0.5759     | 0.6034 |
|                | LSA-4  | 0.4978  | 0.5036 | -         | -      | 0.5017 | 0.5034 | 0.4968  | 0.4953 | 0.5011     | 0.5001 |
|                | Ours   | 0.7698  | 0.8564 | -         | -      | 0.8432 | 0.8572 | 0.8053  | 0.8818 | 0.7672     | 0.8578 |
| Reed           | LSA-3  | 0.5417  | 0.5712 | 0.5434    | 0.5702 | -      | -      | 0.5417  | 0.5707 | 0.5402     | 0.5714 |
|                | LSA-4  | 0.5089  | 0.5187 | 0.4968    | 0.5211 | -      | -      | 0.5103  | 0.5037 | 0.5167     | 0.5172 |
|                | Ours   | 0.7773  | 0.8532 | 0.7531    | 0.8039 | -      | -      | 0.7482  | 0.8137 | 0.7389     | 0.8023 |
| Simmons        | LSA-3  | 0.5728  | 0.6118 | 0.5688    | 0.6024 | 0.5700 | 0.6103 | -       | -      | 0.5753     | 0.6136 |
|                | LSA-4  | 0.5111  | 0.5012 | 0.5017    | 0.5229 | 0.4933 | 0.5074 | -       | -      | 0.4964     | 0.5001 |
|                | Ours   | 0.7829  | 0.8478 | 0.7831    | 0.8537 | 0.7739 | 0.8439 | -       | -      | 0.7934     | 0.8439 |
| Swarthmore     | LSA-3  | 0.5718  | 0.5984 | 0.5699    | 0.5948 | 0.5689 | 0.5913 | 0.5685  | 0.5903 | -          | -      |
|                | LSA-4  | 0.5097  | 0.5113 | 0.5001    | 0.5047 | 0.5116 | 0.5218 | 0.5104  | 0.5059 | -          | -      |
|                | Ours   | 0.7837  | 0.8463 | 0.7734    | 0.8463 | 0.7764 | 0.8512 | 0.7598  | 0.8439 | -          | -      |

Table 6: Performance of LinkThief on the ArnetMiner dataset with a target graph leak rate of 0.1.

| Shadow Dataset |        |               |               |               |               |               |               |
|----------------|--------|---------------|---------------|---------------|---------------|---------------|---------------|
| Target         | Attack | Dblpv7        |               | Acmv9         |               | Citationv1    |               |
| Dataset        | Method | ASR           | AUC           | ASR           | AUC           | ASR           | AUC           |
| Dblpv7         | LSA-3  | -             | -             | 0.8278        | 0.8864        | 0.8304        | 0.8884        |
|                | LSA-4  | -             | -             | 0.8111        | 0.8674        | 0.8051        | 0.8654        |
|                | Ours   | -             | -             | <b>0.8240</b> | <b>0.8915</b> | <b>0.8281</b> | <b>0.8961</b> |
| Acmv9          | LSA-3  | 0.8278        | 0.8913        | -             | -             | 0.8392        | 0.9096        |
|                | LSA-4  | 0.8066        | 0.8673        | -             | -             | 0.8305        | 0.9006        |
|                | Ours   | <b>0.8257</b> | <b>0.8953</b> | -             | -             | <b>0.8331</b> | <b>0.9109</b> |
| Citationv1     | LSA-3  | 0.8386        | 0.8951        | 0.8398        | 0.9082        | -             | -             |
|                | LSA-4  | 0.8220        | 0.8932        | 0.8334        | 0.8940        | -             | -             |
|                | Ours   | <b>0.8364</b> | <b>0.8998</b> | <b>0.8367</b> | <b>0.9074</b> | -             | -             |

Table 7: Performance of LinkThief on the ArnetMiner dataset with a target graph leak rate of 0.2.

| Shadow Dataset |        |               |               |               |               |               |               |
|----------------|--------|---------------|---------------|---------------|---------------|---------------|---------------|
| Target         | Attack | Dblpv7        |               | Acmv9         |               | Citationv1    |               |
| Dataset        | Method | ASR           | AUC           | ASR           | AUC           | ASR           | AUC           |
| Dblpv7         | LSA-3  | -             | -             | 0.8292        | 0.8871        | 0.8302        | 0.8906        |
|                | LSA-4  | -             | -             | 0.8112        | 0.8814        | 0.8052        | 0.8769        |
|                | Ours   | -             | -             | <b>0.8311</b> | <b>0.8993</b> | <b>0.8351</b> | <b>0.9043</b> |
| Acmv9          | LSA-3  | 0.8261        | 0.8926        | -             | -             | 0.8384        | 0.9140        |
|                | LSA-4  | 0.8086        | 0.8773        | -             | -             | 0.8269        | 0.9006        |
|                | Ours   | <b>0.8294</b> | <b>0.8979</b> | -             | -             | <b>0.8412</b> | <b>0.9153</b> |
| Citationv1     | LSA-3  | 0.8362        | 0.8953        | 0.8422        | 0.9119        | -             | -             |
|                | LSA-4  | 0.8322        | 0.8931        | 0.8334        | 0.8944        | -             | -             |
|                | Ours   | <b>0.8425</b> | <b>0.9067</b> | <b>0.8498</b> | <b>0.9145</b> | -             | -             |

Table 8: Performance of LinkThief on the Airport dataset with a target graph leak rate of 0.1.

| Shadow Dataset |        |               |               |               |               |               |               |
|----------------|--------|---------------|---------------|---------------|---------------|---------------|---------------|
| Target         | Attack | Brazil        |               | Europe        |               | USA           |               |
| Dataset        | Method | ASR           | AUC           | ASR           | AUC           | ASR           | AUC           |
| Brazil         | LSA-3  | -             | -             | 0.7788        | 0.8419        | 0.7948        | 0.8603        |
|                | LSA-4  | -             | -             | 0.6801        | 0.7390        | 0.5567        | 0.6468        |
|                | Ours   | -             | -             | <b>0.7752</b> | <b>0.8425</b> | <b>0.7924</b> | <b>0.8591</b> |
| Europe         | LSA-3  | 0.7932        | 0.8584        | -             | -             | 0.8017        | 0.8850        |
|                | LSA-4  | 0.7853        | 0.8530        | -             | -             | 0.6612        | 0.8044        |
|                | Ours   | <b>0.7974</b> | <b>0.8615</b> | -             | -             | <b>0.8157</b> | <b>0.8902</b> |
| USA            | LSA-3  | 0.8604        | 0.9305        | 0.8678        | 0.9341        | -             | -             |
|                | LSA-4  | 0.8496        | 0.9264        | 0.8367        | 0.9132        | -             | -             |
|                | Ours   | <b>0.8637</b> | <b>0.9320</b> | <b>0.8719</b> | <b>0.9358</b> | -             | -             |

Table 9: Performance of LinkThief on the Airport dataset with a target graph leak rate of 0.2.

| Shadow Dataset |        |               |               |               |               |               |               |
|----------------|--------|---------------|---------------|---------------|---------------|---------------|---------------|
| Target         | Attack | Brazil        |               | Europe        |               | USA           |               |
| Dataset        | Method | ASR           | AUC           | ASR           | AUC           | ASR           | AUC           |
| Brazil         | LSA-3  | -             | -             | 0.8097        | 0.8769        | 0.7919        | 0.8803        |
|                | LSA-4  | -             | -             | 0.6801        | 0.7390        | 0.5567        | 0.6468        |
|                | Ours   | -             | -             | <b>0.8056</b> | <b>0.8792</b> | <b>0.8040</b> | <b>0.8878</b> |
| Europe         | LSA-3  | 0.8248        | 0.8964        | -             | -             | 0.8257        | 0.8951        |
|                | LSA-4  | 0.7853        | 0.8730        | -             | -             | 0.6612        | 0.8044        |
|                | Ours   | <b>0.8230</b> | <b>0.8944</b> | -             | -             | <b>0.8291</b> | <b>0.8995</b> |
| USA            | LSA-3  | 0.8704        | 0.9402        | 0.8772        | 0.9387        | -             | -             |
|                | LSA-4  | 0.8496        | 0.9264        | 0.8367        | 0.9132        | -             | -             |
|                | Ours   | <b>0.8713</b> | <b>0.9422</b> | <b>0.8783</b> | <b>0.9441</b> | -             | -             |
